# Supplementary material
Source: publisher site journal article supplement (https://www.spandidos-publications.com/4684/downloadSupplementary)
Supplement: Supplementary file 1 [file downloadSupplementary]

Table SI. Expression of PCNA in relation to clinicopathological features within the carcinomatous component of uterine carcinosarcomas.

| Parameter                        | n  | Expression level of PCNA |           | P-value            |
|----------------------------------|----|--------------------------|-----------|--------------------|
|                                  |    | Yes, n (%)               | No, n (%) |                    |
| Age, years                       |    |                          |           | 0.1 <sup>a</sup>   |
| <50                              | 2  | 2 (100)                  | 0         |                    |
| 50-60                            | 5  | 1 (20)                   | 4 (80)    |                    |
| >60                              | 23 | 9 (39)                   | 14 (61)   |                    |
| Carcinomatous component          |    |                          |           | 0.129 <sup>b</sup> |
| Endometrioid                     | 26 | 12 (46)                  | 14 (54)   |                    |
| Non-endometrioid                 | 4  | 0                        | 4 (100)   |                    |
| Myometrial invasion              |    |                          |           | 0.722 <sup>b</sup> |
| Yes                              | 16 | 7 (44)                   | 9 (56)    |                    |
| No                               | 14 | 5 (36)                   | 9 (64)    |                    |
| Lymphovascular space invasion    |    |                          |           | 0.709 <sup>b</sup> |
| Yes                              | 18 | 8 (44)                   | 10 (56)   |                    |
| No                               | 12 | 4 (33)                   | 8 (67)    |                    |
| Stage (FIGO)                     |    |                          |           | 0.234 <sup>a</sup> |
| I                                | 11 | 4 (36)                   | 7 (64)    |                    |
| II                               | 6  | 3 (50)                   | 3 (50)    |                    |
| III                              | 7  | 1 (14)                   | 6 (86)    |                    |
| IV                               | 6  | 4 (67)                   | 2 (33)    |                    |
| Presence of tumor in the oviduct |    |                          |           | 0.391 <sup>b</sup> |
| Yes                              | 7  | 4 (57)                   | 3 (43)    |                    |
| No                               | 23 | 8 (35)                   | 15 (65)   |                    |
| Grade                            |    |                          |           | 0.204 <sup>a</sup> |
| G1                               | 5  | 3 (60)                   | 2 (40)    |                    |
| G2                               | 7  | 1 (14)                   | 6 (86)    |                    |
| G3                               | 18 | 8 (44)                   | 10 (56)   |                    |
| Metastasis                       |    |                          |           | 1.0 <sup>b</sup>   |

|                    |    |         |         |                    |
|--------------------|----|---------|---------|--------------------|
| Yes                | 12 | 5 (42)  | 7 (56)  |                    |
| No                 | 18 | 7 (39)  | 11 (61) |                    |
| Omental metastasis |    |         |         | 0.018 <sup>b</sup> |
| Yes                | 4  | 4 (100) | 0       |                    |
| No                 | 26 | 8 (31)  | 18 (69) |                    |

<sup>a</sup>X<sup>2</sup>-Pearson's test; <sup>b</sup>Fisher's exact test. PCNA, proliferating cell nuclear antigen.

Table SII. Expression of MCM3 in relation to clinicopathological features within the carcinomatous component of uterine carcinosarcomas.

| Parameter                        | n  | Expression level of MCM3 |           | P-value             |
|----------------------------------|----|--------------------------|-----------|---------------------|
|                                  |    | Yes, n (%)               | No, n (%) |                     |
| Age, years                       |    |                          |           | 0.095 <sup>a</sup>  |
| <50                              | 2  | 2 (100)                  | 0         |                     |
| 50-60                            | 5  | 0                        | 5 (100)   |                     |
| >60                              | 23 | 3 (13)                   | 20 (87)   |                     |
| Carcinomatous component          |    |                          |           | 0.611 <sup>b</sup>  |
| Endometrioid                     | 26 | 9 (35)                   | 17 (65)   |                     |
| Non-endometrioid                 | 4  | 2 (50)                   | 2 (50)    |                     |
| Myometrial invasion              |    |                          |           | 1.0 <sup>b</sup>    |
| Yes                              | 16 | 6 (37)                   | 10 (63)   |                     |
| No                               | 14 | 5 (36)                   | 9 (64)    |                     |
| Lymphovascular space invasion    |    |                          |           | 0.442 <sup>a</sup>  |
| Yes                              | 18 | 8 (44)                   | 10 (56)   |                     |
| No                               | 12 | 3 (25)                   | 9 (75)    |                     |
| Stage (FIGO)                     |    |                          |           | 0.0303 <sup>a</sup> |
| I                                | 11 | 6 (55)                   | 5 (45)    |                     |
| II                               | 6  | 1 (17)                   | 5 (83)    |                     |
| III                              | 7  | 0                        | 7 (100)   |                     |
| IV                               | 6  | 4 (67)                   | 2 (33)    |                     |
| Presence of tumor in the oviduct |    |                          |           | 0.371 <sup>b</sup>  |
| Yes                              | 7  | 4 (57)                   | 3 (43)    |                     |
| No                               | 23 | 7 (30)                   | 16 (70)   |                     |
| Grade                            |    |                          |           | 0.377 <sup>a</sup>  |
| G1                               | 5  | 1 (20)                   | 4(80)     |                     |

|                    |    |         |         |                    |
|--------------------|----|---------|---------|--------------------|
|                    |    |         |         |                    |
| G2                 | 7  | 4 (57)  | 3(43)   |                    |
| G3                 | 18 | 6 (33)  | 12(67)  |                    |
| Metastasis         |    |         |         | 1.0 <sup>b</sup>   |
| Yes                | 12 | 4 (33)  | 8 (67)  |                    |
| No                 | 18 | 7 (39)  | 11 (61) |                    |
| Omental metastasis |    |         |         | 0.012 <sup>b</sup> |
| Yes                | 4  | 4 (100) | 0       |                    |
| No                 | 26 | 7 (27)  | 19 (73) |                    |

<sup>a</sup>X<sup>2</sup>-Pearson's test; <sup>b</sup>Fisher's exact test.

Table SIII. Expression of topoII $\alpha$  in relation to clinicopathological features within the carcinomatous component of uterine carcinosarcomas.

| Parameter                        | n  | Expression level of topoII $\alpha$ |           | P-value            |
|----------------------------------|----|-------------------------------------|-----------|--------------------|
|                                  |    | Yes, n (%)                          | No, n (%) |                    |
| Age, years                       |    |                                     |           | 0.170 <sup>a</sup> |
| <50                              | 2  | 2 (100)                             | 0         |                    |
| 50-60                            | 5  | 2 (40)                              | 3 (60)    |                    |
| >60                              | 23 | 9(39)                               | 14 (61)   |                    |
| Carcinomatous component          |    |                                     |           | 0.613 <sup>b</sup> |
| Endometrioid                     | 26 | 12 (46)                             | 14 (54)   |                    |
| Non-endometrioid                 | 4  | 1 (25)                              | 3 (75)    |                    |
| Myometrial invasion              |    |                                     |           |                    |
| Yes                              | 16 | 4 (25)                              | 12 (75)   |                    |
| No                               | 14 | 9 (64)                              | 5 (36)    |                    |
| Lymphovascular space invasion    |    |                                     |           | 0.264 <sup>b</sup> |
| Yes                              | 18 | 6 (33)                              | 12 (67)   |                    |
| No                               | 12 | 7 (58)                              | 5 (42)    |                    |
| Stage (FIGO)                     |    |                                     |           | 0.049 <sup>a</sup> |
| I                                | 11 | 7 (64)                              | 4 (36)    |                    |
| II                               | 6  | 1 (17)                              | 5 (83)    |                    |
| III                              | 7  | 1 (14)                              | 6 (86)    |                    |
| IV                               | 6  | 4 (67)                              | 2 (33)    |                    |
| Presence of tumor in the oviduct |    |                                     |           | 0.666 <sup>b</sup> |
| Yes                              | 7  | 4 (57)                              | 3 (43)    |                    |
| No                               | 23 | 9 (39)                              | 14 (61)   |                    |
| Grade                            |    |                                     |           | 0.164 <sup>a</sup> |
| G1                               | 5  | 4 (80)                              | 1 (20)    |                    |
| G2                               | 7  | 2 (29)                              | 5 (71)    |                    |
| G3                               | 18 | 7 (39)                              | 11 (61)   |                    |
| Metastasis                       |    |                                     |           | 1.0 <sup>b</sup>   |

|                    |    |         |         |                    |
|--------------------|----|---------|---------|--------------------|
| Yes                | 12 | 5 (42)  | 7 (58)  |                    |
| No                 | 18 | 8 (44)  | 10 (56) |                    |
| Omental metastasis |    |         |         | 0.026 <sup>b</sup> |
| Yes                | 4  | 4 (100) | 0       |                    |
| No                 | 26 | 9 (35)  | 17 (65) |                    |

<sup>a</sup>X<sup>2</sup>-Pearson's test; <sup>b</sup>Fisher's exact test. topoII $\alpha$ , topoisomerase II $\alpha$ .
